# Supplementary material for: Regioregular, yet ductile and amorphous indacenodithiophene-based polymers with high-mobility for stretchable plastic transistors
Source: Royal Society of Chemistry journal article supplement (doi:10.1039/d1tc01984h), 2021-01-01
Supplement: d1tc01984h1.pdf [file d1tc01984h1.pdf]

## Electronic Supplementary Information

### Regioregular, Yet Ductile and Amorphous Indacenodithiophene-based Polymers with High-Mobility for Stretchable Plastic Transistors

Yongjoon Cho,<sup>†,§</sup> Sohee Park,<sup>‡,§</sup> Seonghun Jeong,<sup>†</sup> Heesoo Yang,<sup>‡</sup> Byongkyu Lee,<sup>†</sup> Sang Myeon Lee,<sup>†</sup> Byoung Hoon Lee,<sup>\*,‡</sup> and Changduk Yang<sup>\*,†</sup>

<sup>†</sup>*Department of Energy Engineering, School of Energy and Chemical Engineering, Perovtronics Research Center, Low Dimensional Carbon Materials Center, Ulsan National Institute of Science and Technology (UNIST), 50 UNIST-gil, Ulsu-gun, Ulsan 44919, Republic of Korea.*

<sup>‡</sup>*Department of Chemical Engineering and Materials Science, Graduate Program in System Health Science and Engineering, Ewha Womans University, Seoul 03760, Republic of Korea*

Email: yang@unist.ac.kr, leebhoon@ewha.ac.kr

**Table S1.** Mobility, on/off current ratio, threshold voltage, LUMO/HOMO levels, molecular weight with PDI, channel length, and device structures of CDT- and IDT-based OFETs reported in the literature.

| <i>p</i> -type polymers | Hole mobility [cm <sup>2</sup> V <sup>-1</sup> s <sup>-1</sup> ] | I <sub>on</sub> /I <sub>off</sub> | V <sub>T</sub> [V] | LUMO/HOMO [eV] | Mn [kDa]/ PDI | Channel length [μm] | Device structure | Ref. |
|-------------------------|------------------------------------------------------------------|-----------------------------------|--------------------|----------------|---------------|---------------------|------------------|------|
| P <sub>C</sub> 1        | 1.4                                                              | 6.3 × 10 <sup>2</sup>             | 10.1               | -3.55/ -4.80   | 68/ 3.6       | 80 or 160           | BG/ BC           | 1    |
| P <sub>C</sub> 2        | 0.3                                                              | 2.8 × 10                          | 9.6                | -3.89/ -5.19   | 67/ 4.1       | 80 or 160           | BG/ BC           | 1    |
| P <sub>C</sub> 3        | 0.62                                                             | 1.4 × 10 <sup>4</sup>             | -1.9               | -3.15/ -4.98   | 23.5/ 2.47    | 80                  | BG/ BC           | 2    |
| P <sub>C</sub> 4        | 1.45                                                             | 2.2 × 10 <sup>4</sup>             | -1.3               | -3.11/ -5.00   | 23.1/ 2.45    | 80                  | BG/ BC           | 2    |
| P <sub>C</sub> 5        | 1.2                                                              | 5.5 × 10                          | 14.6               | -3.78/ -5.03   | 62/ 3.4       | 80 or 160           | BG/ BC           | 1    |
| P <sub>C</sub> 6        | 5 × 10 <sup>-3</sup>                                             | 1 × 10 <sup>4</sup>               | N/A                | -3.69/ -5.23   | 40/ 2.5       | 20                  | BG/ TC           | 3    |

|                   |                                             |                                   |       |              |            |           |        |    |
|-------------------|---------------------------------------------|-----------------------------------|-------|--------------|------------|-----------|--------|----|
| P <sub>C</sub> 7  | 0.4                                         | $2 \times 10^3$                   | N/A   | -3.70/ -5.07 | 28/ 1.9    | 20        | BG/ TC | 3  |
| P <sub>C</sub> 8  | 0.6                                         | $2 \times 10^4$                   | N/A   | -3.70/ -5.16 | 34/ 3.1    | 20        | BG/ TC | 3  |
| P <sub>C</sub> 9  | $1.05 \times 10^{-3}$                       | $10^4$                            | -2    | -3.04/ -4.88 | 16.2/ 2.55 | 50        | BG/ TC | 4  |
| P <sub>C</sub> 10 | $4.3 \times 10^{-4}$                        | $2.4 \times 10^3$                 | -6.2  | -3.0/ -5.1   | 23/ 2.4    | 80 or 160 | BG/ BC | 5  |
| P <sub>C</sub> 11 | 1.1                                         | $9.8 \times 10^5$                 | 1.6   | -3.25/ -5.30 | 34/ 2.0    | 80 or 160 | BG/ BC | 6  |
| P <sub>C</sub> 12 | 1.0                                         | $1.4 \times 10^6$                 | 7.1   | -3.31/ -5.25 | 28/ 2.1    | 80 or 160 | BG/ BC | 6  |
| P <sub>C</sub> 13 | $5.8 \times 10^{-3}$                        | $1.6 \times 10^4$                 | -19.1 | -3.1/ -5.2   | 25/ 2.4    | 80 or 160 | BG/ BC | 5  |
| P <sub>C</sub> 14 | 1.1                                         | $1.3 \times 10^6$                 | 4.2   | -3.34/ -5.30 | 33/ 2.3    | 80 or 160 | BG/ BC | 6  |
| P <sub>C</sub> 15 | $3.7 \times 10^{-4}$<br>(electron mobility) | $10^2$                            | 22    | -3.70/ -5.25 | 21.8/ 1.4  | 60        | BG/ TC | 7  |
| P <sub>I</sub> 1  | 3.6                                         | $10^6$                            | N/A   | -3.7/ -5.4   | 80/ 2      | 20        | TG/ BC | 8  |
| P <sub>I</sub> 2  | 0.09                                        | $3 \times 10^6 \pm 2 \times 10^6$ | N/A   | -3.32/ -5.58 | 15/ 1.7    | 50        | BG/ TC | 9  |
| P <sub>I</sub> 3  | 0.3                                         | $6 \times 10^4 \pm 3 \times 10^4$ | N/A   | N/A          | 14/ 1.6    | 50        | BG/ TC | 9  |
| P <sub>I</sub> 4  | 5.01                                        | $2 \times 10^6$                   | -62   | -3.21/ -5.45 | 138/ 1.98  | 70        | TG/ BC | 10 |
| P <sub>I</sub> 5  | $6.1 \times 10^{-2}$                        | $10^4$ - $10^5$                   | -19   | -3.39/ -5.31 | 51.9/ 1.43 | 40        | BG/ TC | 11 |
| P <sub>I</sub> 6  | $4.9 \times 10^{-4}$<br>(electron mobility) | $10^2$ - $10^3$                   | 38    | -3.67/ -5.34 | 47.3/ 1.72 | 40        | BG/ TC | 11 |
| P <sub>I</sub> 7  | 0.2                                         | $>10^6$                           | -19   | N/A/ -5.4    | 64/ 2.63   | 20        | TG/ BC | 12 |
| P <sub>I</sub> 8  | 0.07 (avg.)                                 | $\sim 10^6$                       | -9    | -3.45/ -5.47 | 29/ 1.52   | N/A       | TG/ BC | 13 |
| P <sub>I</sub> 9  | 0.03 (avg.)                                 | $\sim 10^6$                       | -10   | -4.05/ -5.43 | 20/ 1.45   | N/A       | TG/ BC | 13 |

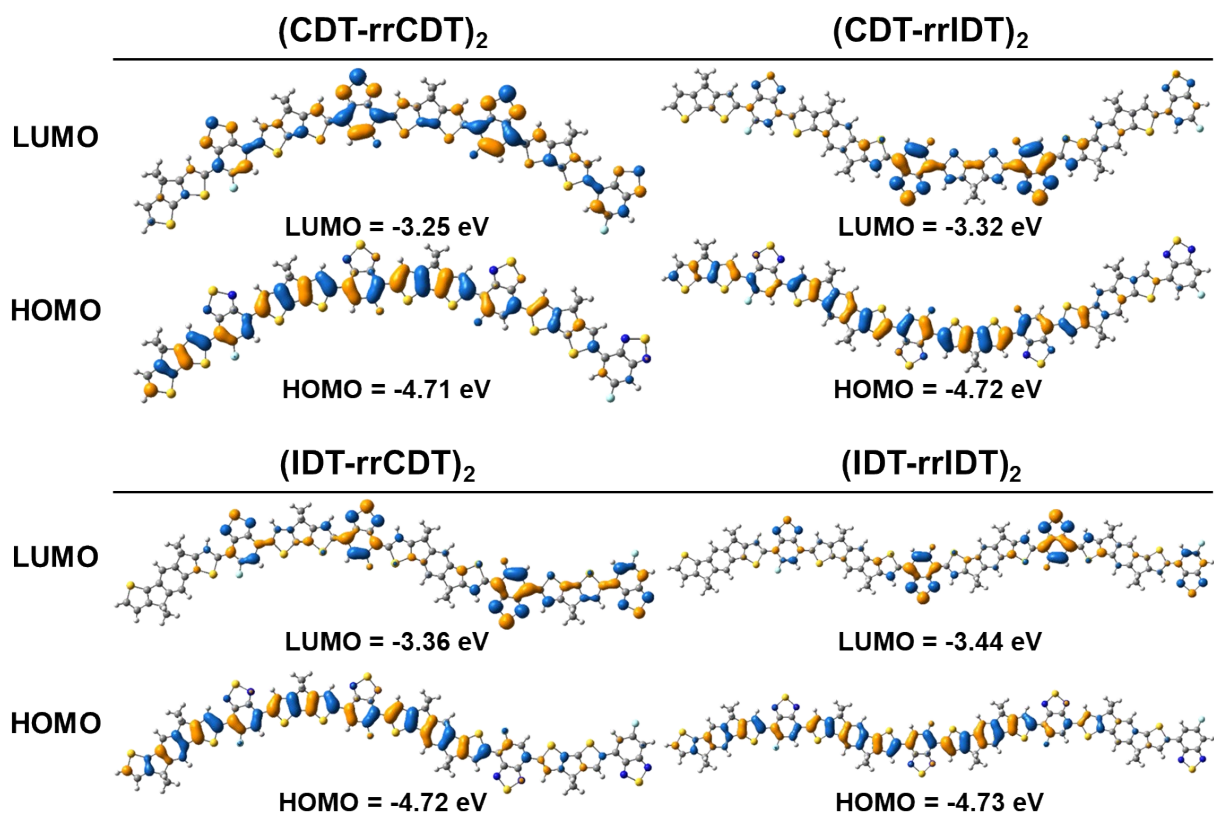

**Figure S1.** Simulated HOMO and LUMO orbitals of the dimers by DFT calculation.

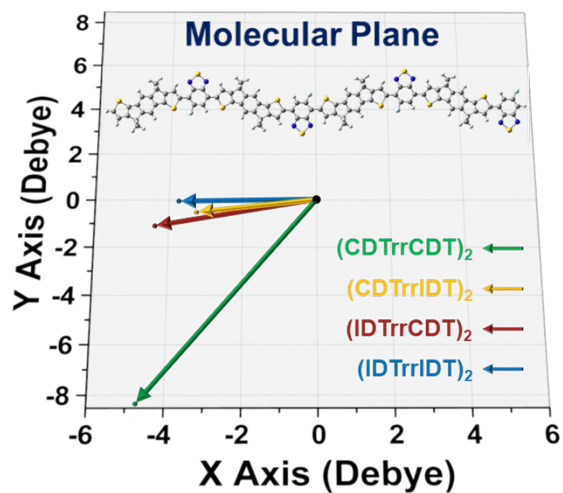

**Figure S2.** Dipole momentum of the dimeric repeating units calculated by DFT (the XY-plane represents the molecular planes).

**Table S2.** Calculated dipole moments and energy levels of the dimers sequenced with (CDT-rrCDT)<sub>2</sub>, (CDT-rrIDT)<sub>2</sub>, (IDT-rrCDT)<sub>2</sub>, and (IDT-rrIDT)<sub>2</sub>.

|                          | Vector |       |      | Dipole Moment<br>[D] | E <sub>HOMO</sub> <sup>DFT</sup><br>[eV] | E <sub>LUMO</sub> <sup>DFT</sup><br>[eV] |
|--------------------------|--------|-------|------|----------------------|------------------------------------------|------------------------------------------|
|                          | x      | y     | z    |                      |                                          |                                          |
| (CDT-rrCDT) <sub>2</sub> | -4.74  | -8.37 | 0.00 | 9.62                 | -4.71                                    | -3.25                                    |
| (CDT-rrIDT) <sub>2</sub> | -3.28  | -0.52 | 0.00 | 3.32                 | -4.72                                    | -3.32                                    |
| (IDT-rrCDT) <sub>2</sub> | -4.38  | -1.10 | 0.00 | 4.51                 | -4.72                                    | -3.36                                    |
| (IDT-rrIDT) <sub>2</sub> | -3.63  | -0.04 | 0.00 | 3.63                 | -4.73                                    | -3.44                                    |

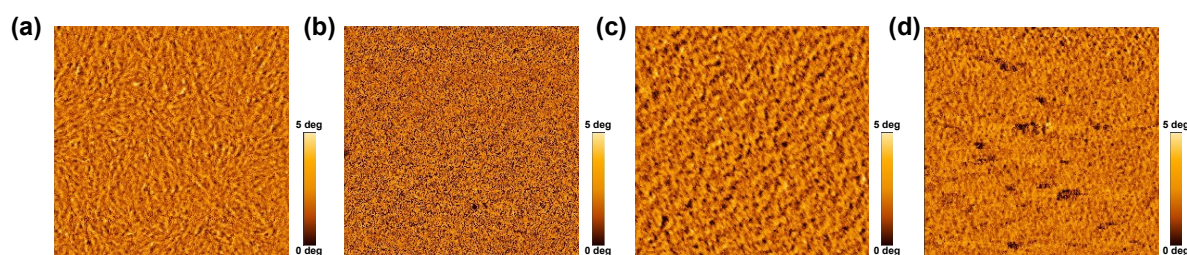

**Figure S3.** AFM phase images of (a) P1, (b) P2, (c) P3, and (d) P4 thin films annealed at optimized temperatures ( $2 \mu\text{m} \times 2 \mu\text{m}$  in size).

**Table S3.** GIWAXS parameters of P1, P2, P3, and P4 annealed under optimized temperatures.

| Out-of-Plane                              |                               |             |                                      |                               |             | In-Plane                                  |                               |             |                            |                               |             |                                      |                               |             |
|-------------------------------------------|-------------------------------|-------------|--------------------------------------|-------------------------------|-------------|-------------------------------------------|-------------------------------|-------------|----------------------------|-------------------------------|-------------|--------------------------------------|-------------------------------|-------------|
| $\pi$ - $\pi$ stacking cell axis<br>(010) |                               |             | lamellar stacking cell axis<br>(100) |                               |             | $\pi$ - $\pi$ stacking cell axis<br>(010) |                               |             | backbone stacking<br>(001) |                               |             | lamellar stacking cell axis<br>(100) |                               |             |
| q<br>[ $\text{\AA}^{-1}$ ]                | d-spacing<br>[ $\text{\AA}$ ] | CCL<br>[nm] | q<br>[ $\text{\AA}^{-1}$ ]           | d-spacing<br>[ $\text{\AA}$ ] | CCL<br>[nm] | q<br>[ $\text{\AA}^{-1}$ ]                | d-spacing<br>[ $\text{\AA}$ ] | CCL<br>[nm] | q<br>[ $\text{\AA}^{-1}$ ] | d-spacing<br>[ $\text{\AA}$ ] | CCL<br>[nm] | q<br>[ $\text{\AA}^{-1}$ ]           | d-spacing<br>[ $\text{\AA}$ ] | CCL<br>[nm] |
| P1                                        | N/A                           |             | 0.262                                | 24.0                          | 26.8        | 1.76                                      | 3.57                          | 5.10        | N/A                        |                               |             | N/A                                  |                               |             |
| P2                                        | 1.54                          | 4.08        | 1.65                                 | 0.262                         | 24.0        | 13.6                                      | N/A                           |             | N/A                        |                               |             | 0.256                                | 24.5                          | 9.81        |
| P3                                        | 1.55                          | 4.06        | 1.55                                 | 0.261                         | 24.1        | 11.6                                      | N/A                           |             | N/A                        |                               |             | 0.257                                | 24.4                          | 10.7        |
| P4                                        | 1.54                          | 4.08        | 1.51                                 | 0.260                         | 24.2        | 8.83                                      | N/A                           |             | 0.394                      | 15.959                        | 15.3        | N/A                                  |                               |             |

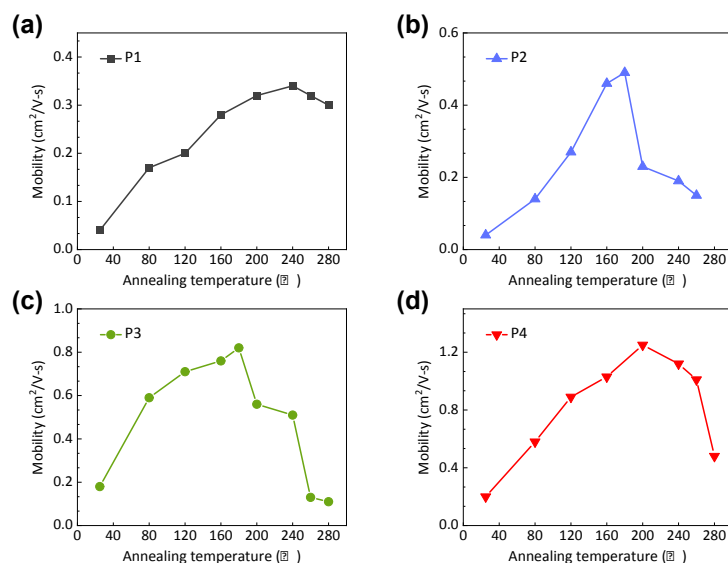

**Figure S4.** Mobility variation of OFETs with annealed (a) P1, (b) P2, (c) P3, and (d) P4 thin films obtained at various annealing temperatures.

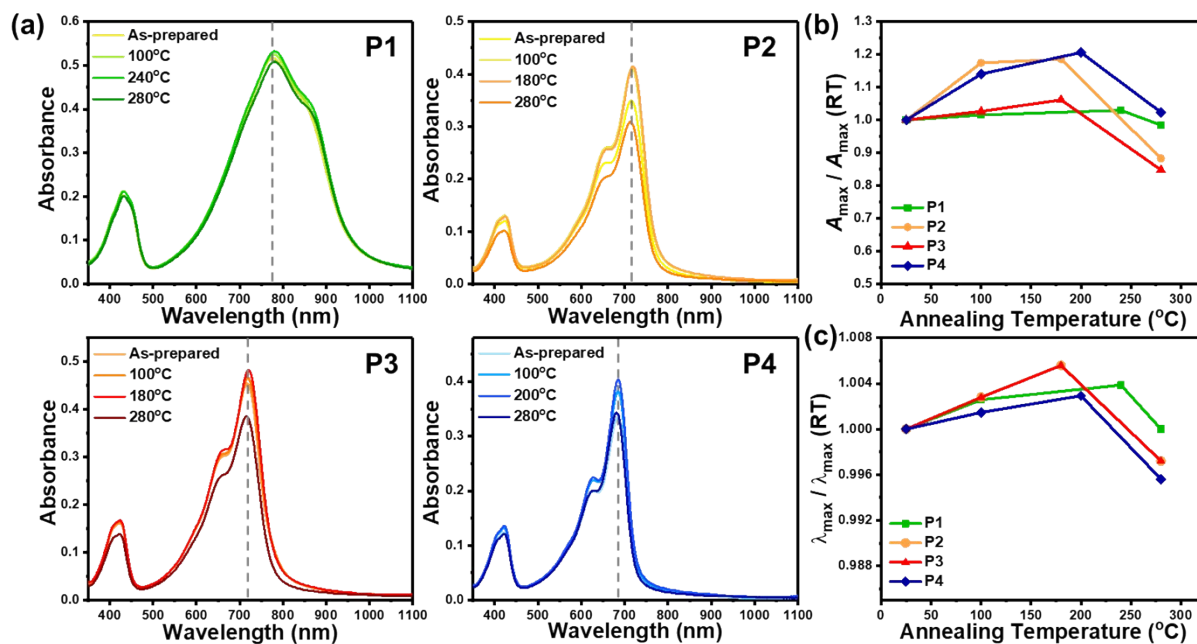

**Figure S5.** (a) UV-Vis absorption spectra of P1–P4 thin films at various thermal annealing temperatures (25–280°C). Changes in (b) absorbance and (c)  $\lambda_{max}$  of thermal annealed P1–P4 thin films relative to pristine thin films.

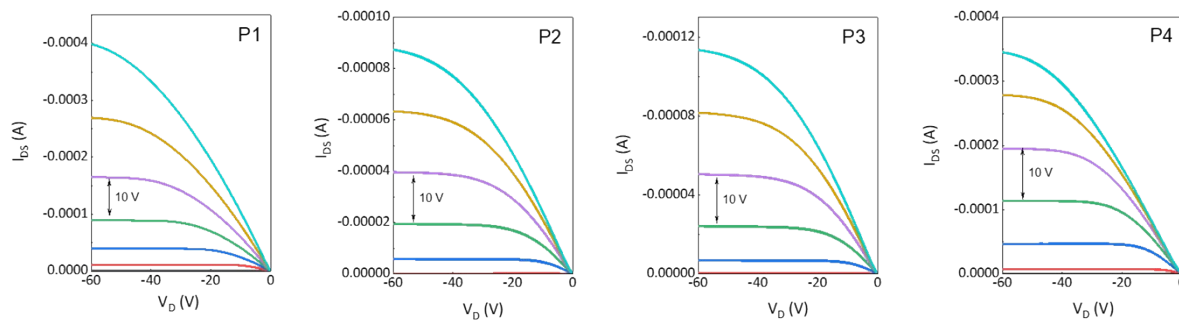

**Figure S6.** Output characteristics of the BGTC devices with MoO<sub>3</sub>/Au source and drain electrodes.

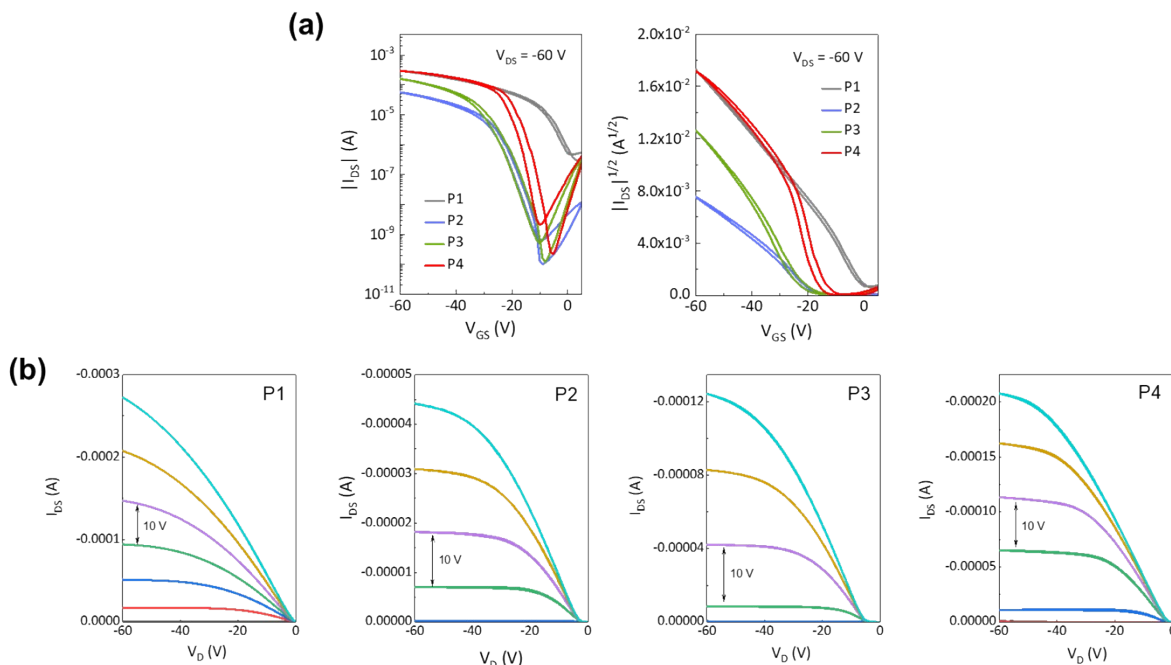

**Figure S7.** (a) Transfer characteristics and (b) output characteristics of the BGTC devices with Au as source and drain electrodes.

**Table S4.** Device parameters of OFETs fabricated with Au contact electrodes.

| Polymer | $\mu_{\max}$<br>[cm <sup>2</sup> V <sup>-1</sup> s <sup>-1</sup> ] | $\mu_{\text{ave}}^*$<br>[cm <sup>2</sup> V <sup>-1</sup> s <sup>-1</sup> ] | $V_T$<br>[V] | On/Off Ratio       |
|---------|--------------------------------------------------------------------|----------------------------------------------------------------------------|--------------|--------------------|
| P1      | 0.44                                                               | 0.32 (0.09)                                                                | 8.4          | $5.75 \times 10^2$ |
| P2      | 0.22                                                               | 0.20 (0.01)                                                                | -18.5        | $5.65 \times 10^5$ |
| P3      | 0.60                                                               | 0.46 (0.09)                                                                | -20.6        | $1.40 \times 10^6$ |
| P4      | 2.22                                                               | 1.74 (0.31)                                                                | -14.0        | $4.54 \times 10^5$ |

\*The values indicate average mobility obtained from the 10 independent OFETs, where the numbers in parentheses indicate standard deviation of the average mobility.

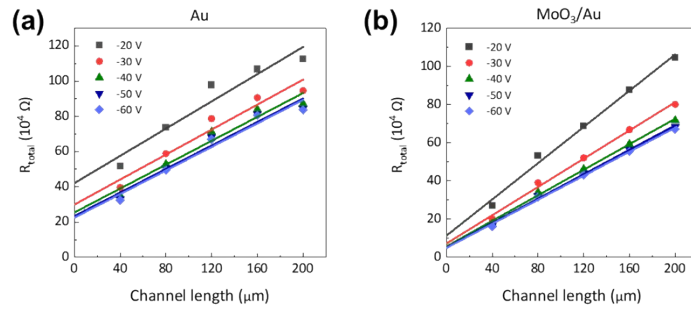

**Figure S8.** Total resistance of the BGTC P4-OFETs without (a) or with (b) MoO<sub>3</sub> electron blocking layers.

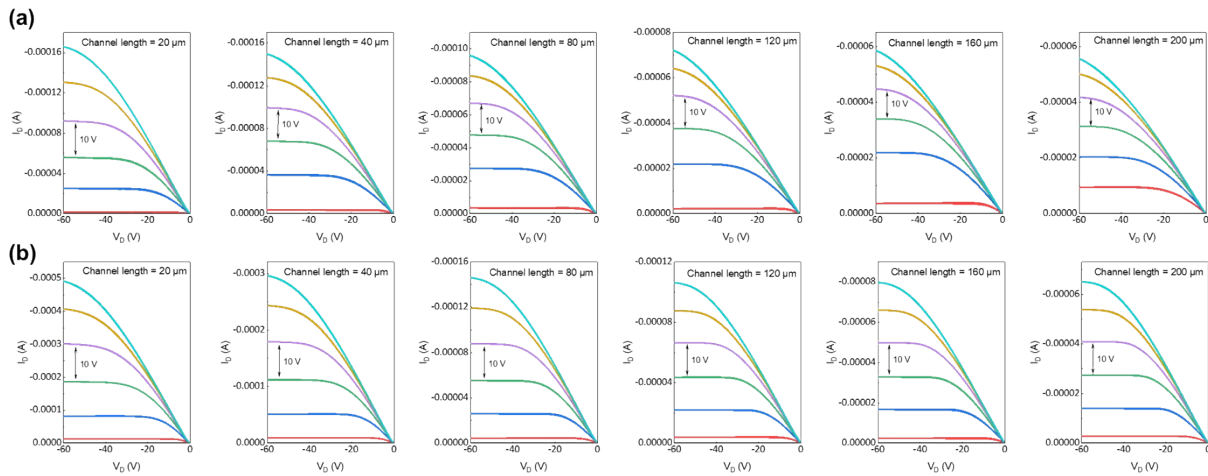

**Figure S9.** Output characteristics of the BGTC P4-OFETs without (a) and with (b) MoO<sub>3</sub> interfacial layers with varying channel length.

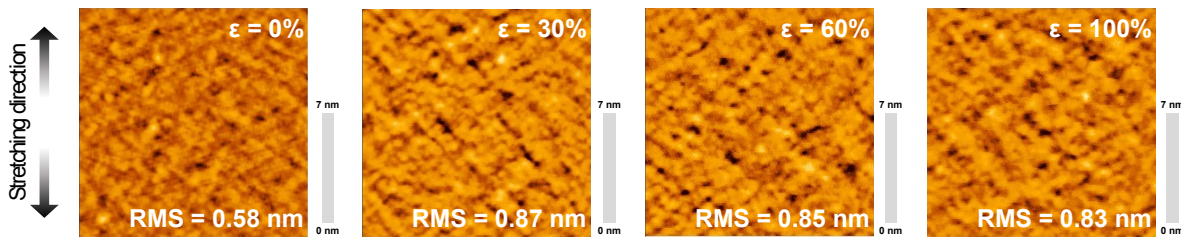

**Figure S10.** AFM topographic images and RMS roughness values of P3 thin films before and after elongation at various strain values ( $\epsilon = 0, 30, 60,$  and  $100\%$ ). Size:  $2 \mu\text{m} \times 2 \mu\text{m}$ .





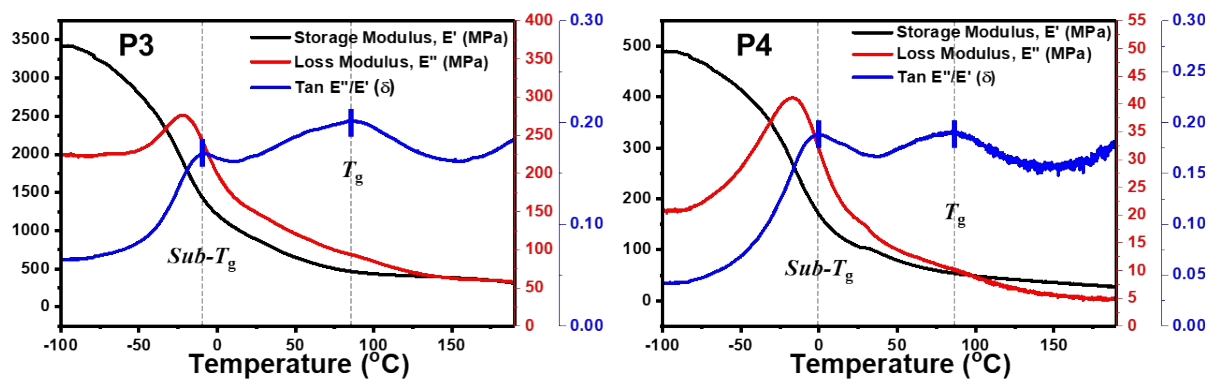

**Figure S11.** DMA measurement results of the storage modulus, loss modulus, and tan ( $\delta$ ) of P3 and P4.

**Table S5.** Sub- $T_g$  and  $T_g$  of P3 and P4.

| Polymer | sub- $T_g^a$ [°C] | $T_g^a$ [°C] |
|---------|-------------------|--------------|
| P3      | -8.7              | 84.9         |
| P4      | -0.4              | 86.8         |

**Table S6.** Previously reported ductile polymers and their crystalline nature, origin of ductility, molecular weight, polydispersity index, charge-carrier mobility, elastomeric substrate, and crack-onset strain.

| Polymer                      | Crystalline nature | Reason for ductility                        | Number-average molecular weight [kDa]/PDI | Mobility [ $\text{cm}^2 \text{V}^{-1} \text{s}^{-1}$ ] | Elastomeric substrate | Crack-onset strain [%] | Reference        |
|------------------------------|--------------------|---------------------------------------------|-------------------------------------------|--------------------------------------------------------|-----------------------|------------------------|------------------|
| P2                           | Near-amorphous     | Amorphous domain, sliding of polymer chains | 90.3 / 1.43                               | 0.49                                                   | PDMS                  | 30                     |                  |
| P3                           | Near-amorphous     | Amorphous domain, sliding of polymer chains | 84.0 / 1.50                               | 1.13                                                   | PDMS                  | 100                    | <b>This work</b> |
| P4                           | Near-amorphous     | Amorphous domain, sliding of polymer chains | 93.5 / 1.80                               | 4.13                                                   | PDMS                  | 60                     |                  |
| PDPP <sub>urethane-TT</sub>  | Semicrystalline    | Secondary bonding                           | 154 / 1.15                                | $2.58 \times 10^{-2}$                                  | PMDS                  | 50                     | 14               |
| PDPP <sub>urethane-BT</sub>  | Semicrystalline    | Secondary bonding                           | 164 / 1.12                                | $3.46 \times 10^{-2}$                                  | PDMS                  | 75                     | 14               |
| PDPP <sub>urethane-TVT</sub> | Semicrystalline    | Secondary bonding                           | 171 / 1.10                                | $3.90 \times 10^{-2}$                                  | PDMS                  | 100                    | 14               |
| T-50                         | Near-amorphous     | Flexible segment                            | 25.7 / 3.2                                | $\sim 2 \times 10^{-2}$                                | PDMS                  | 100                    | 15               |
| T-75                         | Near-amorphous     | Flexible segment                            | 22.9 / 3.5                                | $\sim 2 \times 10^{-2}$                                | PDMS                  | 100                    | 15               |
| TT-50                        | Near-amorphous     | Flexible segment                            | 25.9 / 4.1                                | $\sim 1 \times 10^{-1}$                                | PDMS                  | 100                    | 15               |
| P4                           | Semicrystalline    | Amorphous domain, Twisted orientation       | 126 / 3.00                                | 1.39                                                   | PDMS                  | 60-100                 | 16               |
| P5                           | Semicrystalline    | Amorphous domain, Twisted orientation       | 146 / 3.27                                | 0.84                                                   | PDMS                  | 60-100                 | 16               |
| P6                           | Semicrystalline    | Amorphous domain, Twisted orientation       | 158 / 3.57                                | 1.27                                                   | PDMS                  | 60-100                 | 16               |

|                              |                 |                                                   |             |                         |         |      |        |
|------------------------------|-----------------|---------------------------------------------------|-------------|-------------------------|---------|------|--------|
| P3HT<br>(regioregular)       | Semicrystalline | Conformational disorder of side chains            | 62 / 1.9    | 0.07                    | PDMS    | 150  | 17, 18 |
| rr PHT<br>(regiorandom P3HT) | Amorphous       | Amorphous domain                                  | 14.8 / 3.50 | N/A                     | Ecoflex | 100  | 19     |
| P3                           | Semicrystalline | Soft amorphous domain, Entanglement of nanofibers | 29.5 / 1.69 | $\sim 2 \times 10^{-1}$ | PDMS    | 40   | 20     |
| 20DPPTTECx                   | Semicrystalline | Crosslinking                                      | 16.5 / 4.00 | 0.91                    | PDMS    | >150 | 21     |
| DBB-DPP                      | Semicrystalline | Amorphous domain, Flexible segment                | 24.7 / 2.99 | $\sim 1.80$             | PDMS    | 30   | 22     |
| C6-DPP                       | Semicrystalline | Amorphous domain, Flexible segment                | 40.0 / 2.93 | $\sim 2.30$             | PDMS    | 45   | 22     |
| C12-DPP                      | Semicrystalline | Amorphous domain, Flexible segment                | 31.8 / 32.6 | $\sim 1.50$             | PDMS    | 100  | 22     |
| IDTBT                        | Near-amorphous  | Amorphous domain, Sliding of polymer chains       | 108.6 / 2.7 | 1.8                     | PDMS    | 130  | 23     |
| PDPP-TT-PDMS-25k             | Near-amorphous  | Elastomeric segment                               | 9.50 / 2.53 | 0.08                    | PDMS    | 85   | 24     |
| PII2T                        | Semicrystalline | High free volume by long branched alkyl chain     | N/A         | $1.49 \times 10^{-1}$   | PDMS    | 100  | 25     |
| PIDTBT<br>(low Mw)           | Near-amorphous  | Near-amorphous                                    | 57 / 2.9    | 0.65                    | PDMS    | 30   | 26     |
| PIDTBT<br>(medium Mw)        | Near-amorphous  | Near-amorphous                                    | 100 / 2.8   | 1.65                    | PDMS    | 60   | 26     |
| PIDTBT<br>(High Mw)          | Near-amorphous  | Near-amorphous, High molecular weight             | 112 / 3.0   | 2.17                    | PDMS    | 102  | 26     |
| RP33                         | Near-amorphous  | Amorphous domain                                  | 16.1 / 1.15 | 1.37                    | PDMS    | 40   | 27     |

|              |                 |                                     |             |                    |      |     |    |
|--------------|-----------------|-------------------------------------|-------------|--------------------|------|-----|----|
| PIDTBPD      | Near-amorphous  | Amorphous domain                    | 15 / 1.7    | 0.09               | PDMS | 100 | 9  |
|              |                 |                                     | 18 / 2.2    | $3 \times 10^{-3}$ | PDMS | 40  | 28 |
| PII2T-C6     | Semicrystalline | Floppy side chain                   | 305 / 3.3   | 3.22               | PDMS | 60  | 29 |
| PII2T-C8     | Semicrystalline | Floppy side chain                   | 434 / 1.6   | 8.06               | PDMS | 100 | 29 |
| PII2T-PBA10  | Near-Amorphous  | Soft and elastic side chain         | 133 / 2.5   | 0.22               | PDMS | 40  | 30 |
| PII2T-PBA20  | Near-Amorphous  | Soft and elastic side chain         | 49.6 / 2.6  | 0.063              | PDMS | 60  | 30 |
| PII2T-PBA100 | Only-Amorphous  | Soft and elastic side chain         | 6.9 / 1.3   | $<10^{-7}$         | PDMS | 100 | 30 |
| P2           | Semicrystalline | Amorphous domain, secondary bonding | 19.7 / 3.3  | 1.62               | PDMS | 30  | 31 |
| P3           | Semicrystalline | Amorphous domain, secondary bonding | 16.2 / 3.0  | 1.32               | PDMS | 110 | 31 |
| P4           | Semicrystalline | Amorphous domain, secondary bonding | 35.5 / 2.6  | 0.58               | PDMS | 120 | 31 |
| P3           | Semicrystalline | Amorphous domain, secondary bonding | 55 / 2.33   | 0.31               | PDMS | 60  | 32 |
| P4           | Semicrystalline | Amorphous domain, secondary bonding | 40.8 / 2.22 | 0.073              | PDMS | 60  | 32 |

---

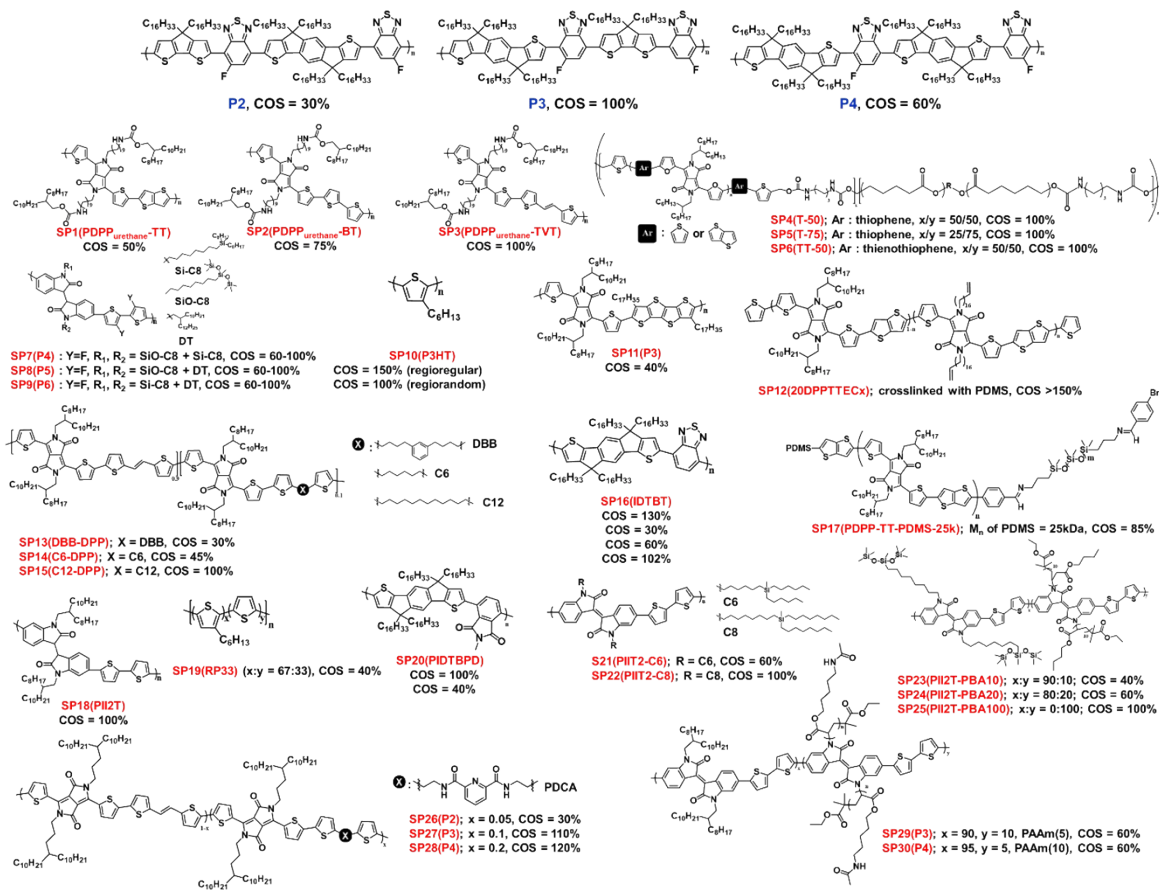

**Figure S12.** Chemical structures and crack-onset strains of P2, P3, and P4 in this work and previously reported ductile polymers.

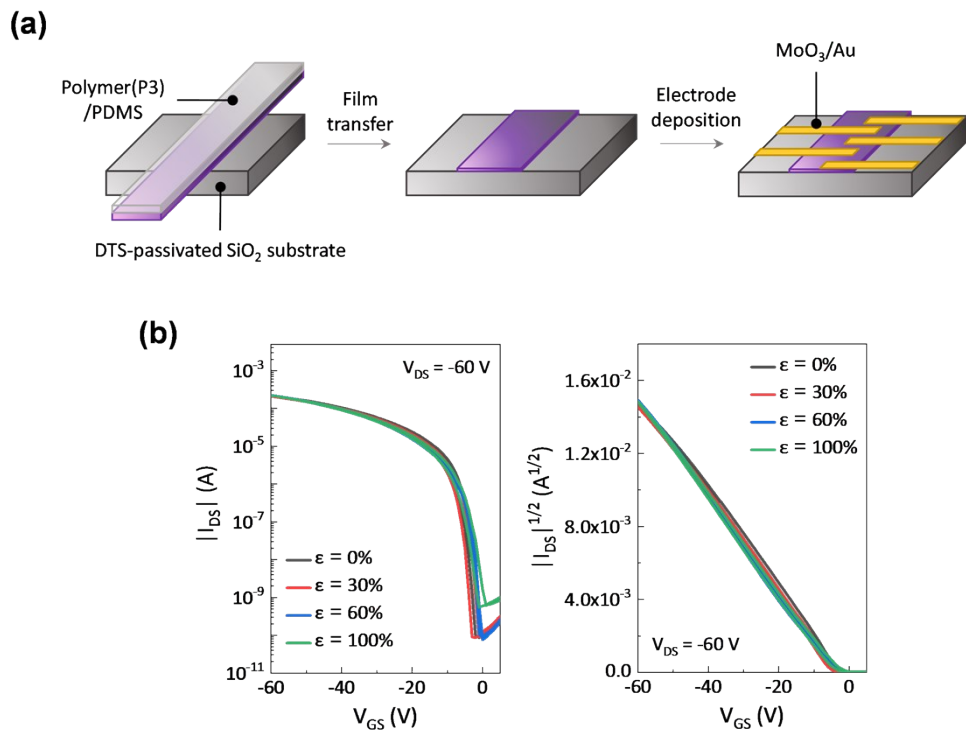

**Figure S13.** (a) Schematic illustration of device fabrication process using stretched P3 thin films by dry transfer process, (b) transfer characteristics of the P3 devices at various strain values ( $\epsilon = 30, 60, \text{ and } 100\%$ ). The transfer curve for  $\epsilon = 0\%$  was obtained from the device fabricated with a transferred P3 thin film without elongation.

**Table S7.** Device parameters of P3-OFETs at various strain values.

| Strain<br>( $\epsilon, \%$ ) | $\mu_{\max}$<br>( $\text{cm}^2 \text{V}^{-1} \text{s}^{-1}$ ) | $\mu_{\text{ave}}^*$<br>( $\text{cm}^2 \text{V}^{-1} \text{s}^{-1}$ ) | $V_T$<br>(V) | On/Off<br>Ratio    |
|------------------------------|---------------------------------------------------------------|-----------------------------------------------------------------------|--------------|--------------------|
| 0                            | 0.27                                                          | 0.26 (0.01)                                                           | -1.42        | $2.60 \times 10^6$ |
| 30                           | 0.27                                                          | 0.27 (0.01)                                                           | -2.88        | $2.33 \times 10^6$ |
| 60                           | 0.30                                                          | 0.26 (0.03)                                                           | -5.92        | $2.93 \times 10^6$ |
| 100                          | 0.35                                                          | 0.30 (0.05)                                                           | -4.74        | $3.60 \times 10^5$ |

\*The values indicate average mobility obtained from the 4 independent OFETs, where the numbers in parentheses indicate standard deviation of the average mobility.

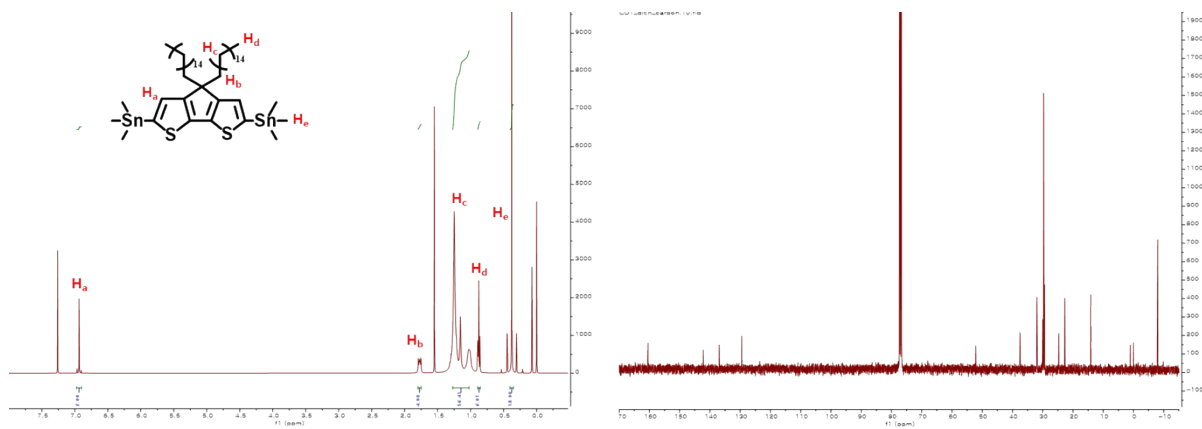

**Figure S14.**  $^1\text{H}$  NMR and  $^{13}\text{C}$  NMR data of M1.

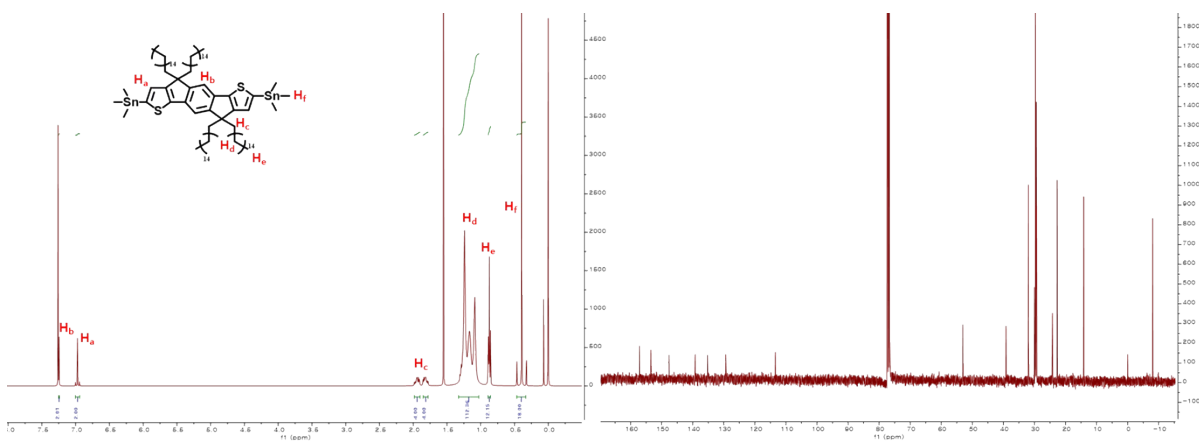

**Figure S15.**  $^1\text{H}$  NMR and  $^{13}\text{C}$  NMR data of M3.

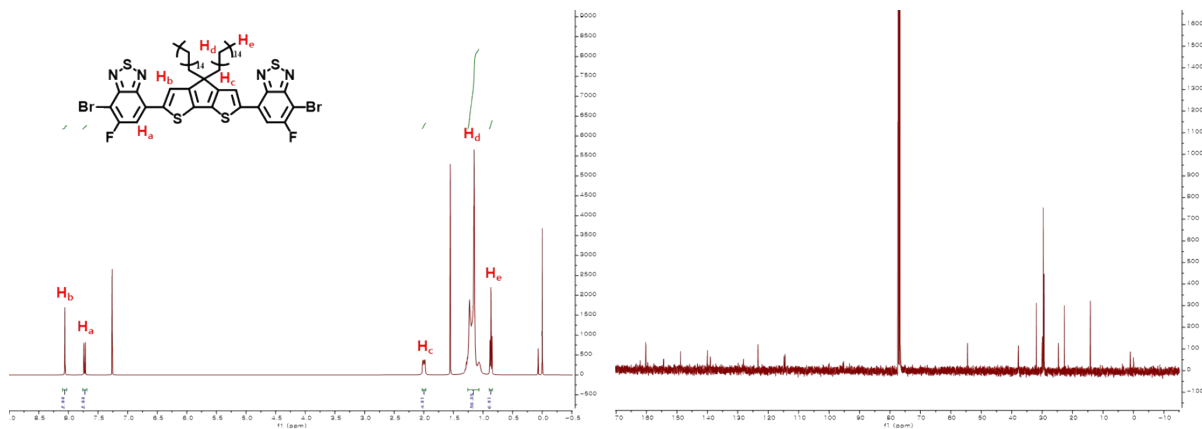

**Figure S16.**  $^1\text{H}$  NMR and  $^{13}\text{C}$  NMR data of M2.

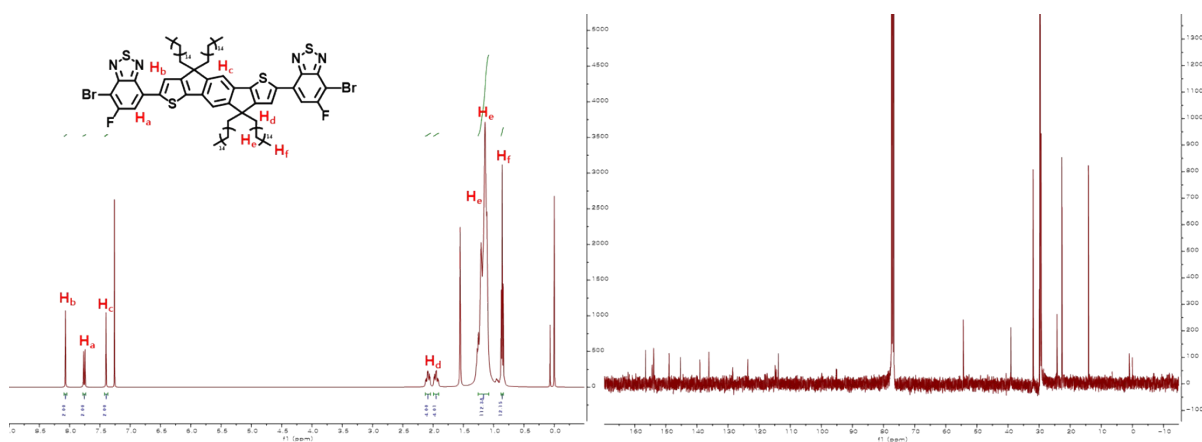

**Figure S17.**  $^1\text{H}$  NMR and  $^{13}\text{C}$  NMR data of M4.



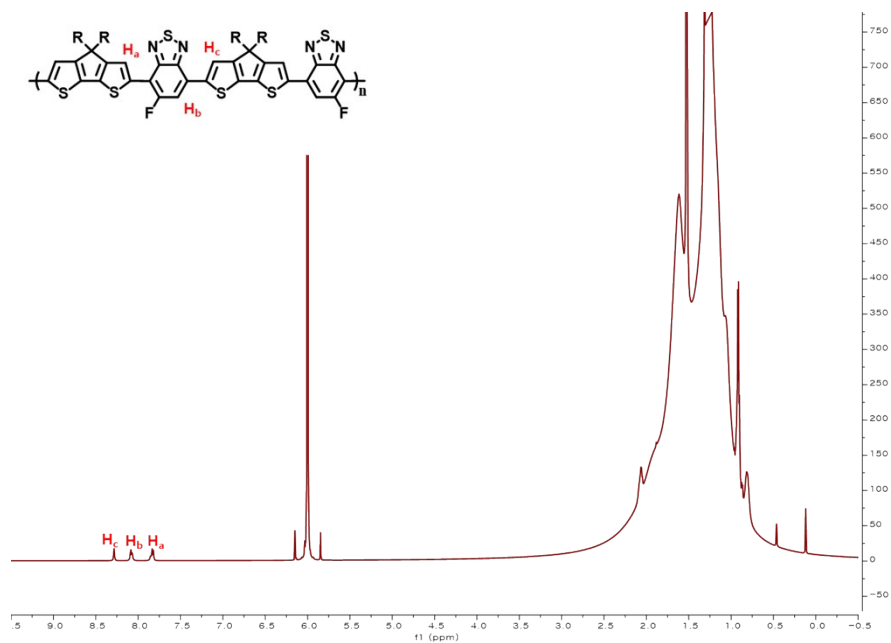

**Figure S18.**  $^1\text{H}$  NMR data of P1.

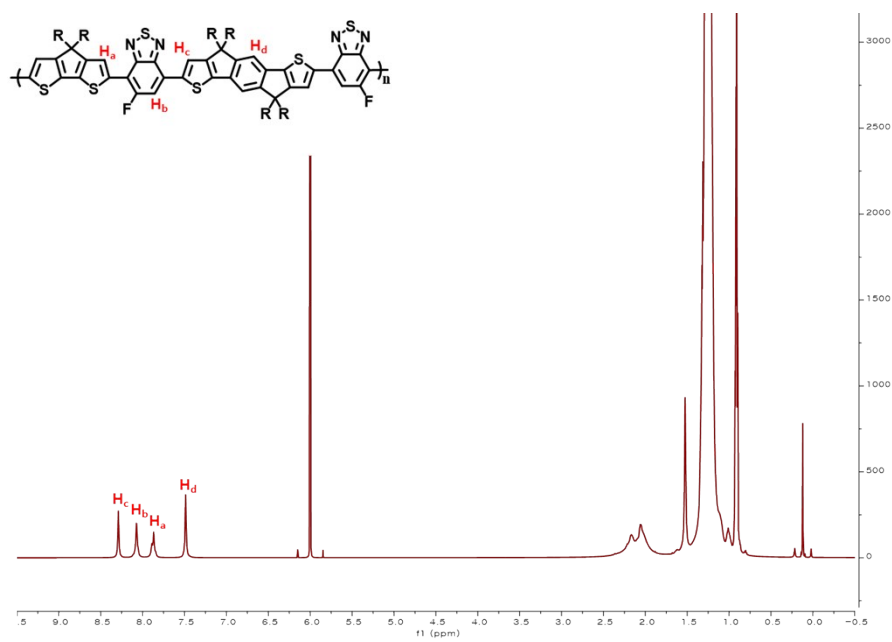

**Figure S19.**  $^1\text{H}$  NMR data of P2.

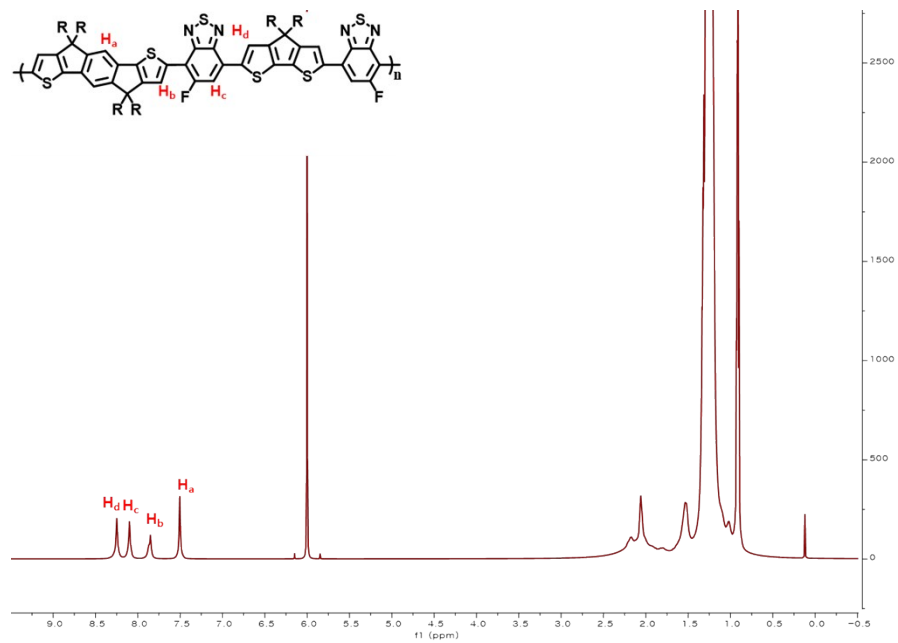

**Figure S20.** <sup>1</sup>H NMR data of P3.

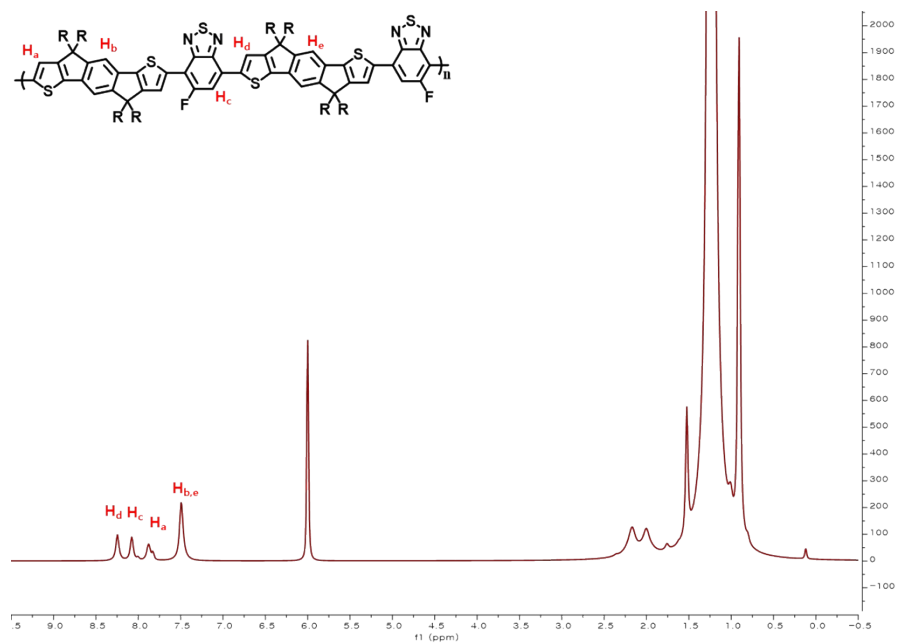

**Figure S21.** <sup>1</sup>H NMR data of P4.

## References

1. M. Wang, M. Ford, H. Phan, J. Coughlin, T.-Q. Nguyen and G. C. Bazan, *Chem. Commun.*, 2016, **52**, 3207-3210.
2. G.-J. N. Wang, L. Shaw, J. Xu, T. Kurosawa, B. C. Schroeder, J. Y. Oh, S. J. Benight and Z. Bao, *Adv. Funct. Mater.*, 2016, **26**, 7254-7262.
3. J. Lee, S. H. Kang, S. M. Lee, K. C. Lee, H. Yang, Y. Cho, D. Han, Y. Li, B. H. Lee and C. Yang, *Angew. Chem. Int. Ed. Engl.*, 2018, **57**, 13629-13634.
4. L. Ying, B. B. Hsu, H. Zhan, G. C. Welch, P. Zalar, L. A. Perez, E. J. Kramer, T. Q. Nguyen, A. J. Heeger, W. Y. Wong and G. C. Bazan, *J. Am. Chem. Soc.*, 2011, **133**, 18538-18541.
5. P. K. Madathil, S. Cho, S. Choi, T.-D. Kim and K.-S. Lee, *Macromol. Res.*, 2018, **26**, 934-941.
6. M. Wang, M. J. Ford, A. T. Lill, H. Phan, T. Q. Nguyen and G. C. Bazan, *Adv. Mater.*, 2017, **29**, 1603830.
7. M. Wang, M. J. Ford, C. Zhou, M. Seifrid, T. Q. Nguyen and G. C. Bazan, *J. Am. Chem. Soc.*, 2017, **139**, 17624-17631.
8. C.-H. Li, J. Kettle and M. Horie, *Mater. Chem. Phys.*, 2014, **144**, 519-528.
9. X. Zhang, H. Bronstein, A. J. Kronemeijer, J. Smith, Y. Kim, R. J. Kline, L. J. Richter, T. D. Anthopoulos, H. Sirringhaus, K. Song, M. Heeney, W. Zhang, I. McCulloch and D. M. DeLongchamp, *Nat Commun*, 2013, **4**, 2238.
10. Y. Li, W. K. Tatum, J. W. Onorato, Y. Zhang and C. K. Luscombe, *Macromolecules*, 2018, **51**, 6352-6358.
11. W. Zhong, S. Sun, L. Ying, F. Liu, L. Lan, F. Huang and Y. Cao, *ACS Appl. Mater. Interfaces*, 2017, **9**, 7315-7321.
12. A. Casey, Y. Han, Z. Fei, A. J. P. White, T. D. Anthopoulos and M. Heeney, *J. Mater. Chem. C*, 2015, **3**, 265-275.

13. W. Zhang, J. Smith, S. E. Watkins, R. Gysel, M. McGehee, A. Salleo, J. Kirkpatrick, S. Ashraf, T. Anthopoulos, M. Heeney and I. McCulloch, *J. Am. Chem. Soc.*, 2010, **132**, 11437-11439.
14. M. Planells, M. Nikolka, M. Hurhangee, P. S. Tuladhar, A. J. P. White, J. R. Durrant, H. Sirringhaus and I. McCulloch, *J. Mater. Chem. C*, 2014, **2**, 8789-8795.
15. M. Y. Lee, S. Dharmapurikar, S. J. Lee, Y. Cho, C. Yang and J. H. Oh, *Chem. Mater.*, 2020, **32**, 1914-1924.
16. F. Sugiyama, A. T. Kleinschmidt, L. V. Kayser, M. A. Alkhadra, J. M. Wan, A. S. Chiang, D. Rodriguez, S. E. Root, S. Savagatrup and D. J. Lipomi, *Macromolecules*, 2018, **51**, 5944-5949.
17. Y. C. Lin, F. H. Chen, Y. C. Chiang, C. C. Chueh and W. C. Chen, *ACS Appl. Mater. Interfaces*, 2019, **11**, 34158-34170.
18. B. O'Connor, E. P. Chan, C. Chan, B. R. Conrad, L. J. Richter, R. J. Kline, M. Heeney, I. McCulloch, C. L. Soles and D. M. DeLongchamp, *ACS Nano*, 2010, **4**, 7538-7544.
19. B. O'Connor, R. J. Kline, B. R. Conrad, L. J. Richter, D. Gundlach, M. F. Toney and D. M. DeLongchamp, *Adv. Funct. Mater.*, 2011, **21**, 3697-3705.
20. C. Y. Gao, M. Pei, H. J. Choi and H. Yang, *Adv. Funct. Mater.*, 2019, **29**.
21. C. Lu, W.-Y. Lee, X. Gu, J. Xu, H.-H. Chou, H. Yan, Y.-C. Chiu, M. He, J. R. Matthews, W. Niu, J. B. H. Tok, M. F. Toney, W.-C. Chen and Z. Bao, *Advanced Electronic Materials*, 2017, **3**.
22. J. Mun, G.-J. N. Wang, J. Y. Oh, T. Katsumata, F. L. Lee, J. Kang, H.-C. Wu, F. Lissel, S. Rondeau-Gagné, J. B. H. Tok and Z. Bao, *Adv. Funct. Mater.*, 2018, **28**.
23. Y. Zheng, G. J. N. Wang, J. Kang, M. Nikolka, H. C. Wu, H. Tran, S. Zhang, H. Yan, H. Chen, P. Y. Yuen, J. Mun, R. H. Dauskardt, I. McCulloch, J. B. H. Tok, X. Gu and Z. Bao, *Adv. Funct. Mater.*, 2019, **29**, 1905340.
24. K. Ditte, J. Perez, S. Chae, M. Hamsch, M. Al-Hussein, H. Komber, P. Formanek, S. C. B. Mannsfeld, A. Fery, A. Kiriy and F. Lissel, *Adv. Mater.*, 2021, **33**, e2005416.

25. H.-C. Wu, S. J. Benight, A. Chortos, W.-Y. Lee, J. Mei, J. W. F. To, C. Lu, M. He, J. B. H. Tok, W.-C. Chen and Z. Bao, *Chem. Mater.*, 2014, **26**, 4544-4551.
26. H. Ren, J. Zhang, Y. Tong, J. Zhang, X. Zhao, N. Cui, Y. Li, X. Ye, Q. Tang and Y. Liu, *J. Mater. Chem. C*, 2020, **8**, 15646-15654.
27. S. Y. Son, J.-H. Kim, E. Song, K. Choi, J. Lee, K. Cho, T.-S. Kim and T. Park, *Macromolecules*, 2018, **51**, 2572-2579.
28. Y. Li, W. K. Tatum, J. W. Onorato, S. D. Barajas, Y. Y. Yang and C. K. Luscombe, *Polym. Chem.*, 2017, **8**, 5185-5193.
29. H.-C. Wu, C.-C. Hung, C.-W. Hong, H.-S. Sun, J.-T. Wang, G. Yamashita, T. Higashihara and W.-C. Chen, *Macromolecules*, 2016, **49**, 8540-8548.
30. H.-F. Wen, H.-C. Wu, J. Aimi, C.-C. Hung, Y.-C. Chiang, C.-C. Kuo and W.-C. Chen, *Macromolecules*, 2017, **50**, 4982-4992.
31. J. Y. Oh, S. Rondeau-Gagne, Y. C. Chiu, A. Chortos, F. Lissel, G. N. Wang, B. C. Schroeder, T. Kurosawa, J. Lopez, T. Katsumata, J. Xu, C. Zhu, X. Gu, W. G. Bae, Y. Kim, L. Jin, J. W. Chung, J. B. Tok and Z. Bao, *Nature*, 2016, **539**, 411-415.
32. Y.-C. Lin, C.-C. Shih, Y.-C. Chiang, C.-K. Chen and W.-C. Chen, *Polym. Chem.*, 2019, **10**, 5172-5183.
